# Supplementary material for: Total Synthesis of the Proposed Structure of Indolyl 1,2-Propanediol Alkaloid, 1-(1H-Indol-3-yloxy)propan-2-ol
Source: MDPI journal article supplement (doi:10.3390/chemistry5040177), 2023-12-12
Supplement: s1 [file s1]

# Total Synthesis of the Proposed Structure of Indolyl 1,2-Propanediol Alkaloid, 1-(1*H*-Indol-3-yloxy)propan-2-ol

Momoko Kimata, and Takumi Abe\*

Graduate School of Medicine, Dentistry and Pharmaceutical Sciences, Okayama University, 1-1-1 Tsushima-naka, Kita-ku, Okayama 7008530, Japan

E-mail: t-abe@okayama-u.ac.jp

## SUPPORTING INFORMATION

| <b>Table of Contents</b>                                                           |                        | <b>Page No</b> |
|------------------------------------------------------------------------------------|------------------------|----------------|
| Copies of <sup>1</sup> H and <sup>13</sup> C{H} NMR spectra of <b><i>TBS-5</i></b> | <b>Figures S1-S2</b>   | <b>S2-3</b>    |
| Copies of <sup>1</sup> H and <sup>13</sup> C{H} NMR spectra of <b>5</b>            | <b>Figures S3-S4</b>   | <b>S4-5</b>    |
| Copies of <sup>1</sup> H and <sup>13</sup> C{H} NMR spectra of <b>6</b>            | <b>Figures S5-S6</b>   | <b>S6-7</b>    |
| Copies of <sup>1</sup> H and <sup>13</sup> C{H} NMR spectra of <b><i>TBS-7</i></b> | <b>Figures S7-S8</b>   | <b>S8-9</b>    |
| Copies of <sup>1</sup> H and <sup>13</sup> C{H} NMR spectra of <b>7</b>            | <b>Figures S9-S10</b>  | <b>S10-11</b>  |
| Copies of <sup>1</sup> H and <sup>13</sup> C{H} NMR spectra of <b>3</b>            | <b>Figures S11-S12</b> | <b>S12-13</b>  |
| Copies of <sup>1</sup> H and <sup>13</sup> C{H} NMR spectra of <b>1</b>            | <b>Figures S13-S14</b> | <b>S14-15</b>  |

**Figure S1.  $^1\text{H}$ -NMR of TBS-5**

D:\Y1H NMR \BYM7-46-sankaime-cdcl3.fid\YM7-46-sankaime-cdcl3.als

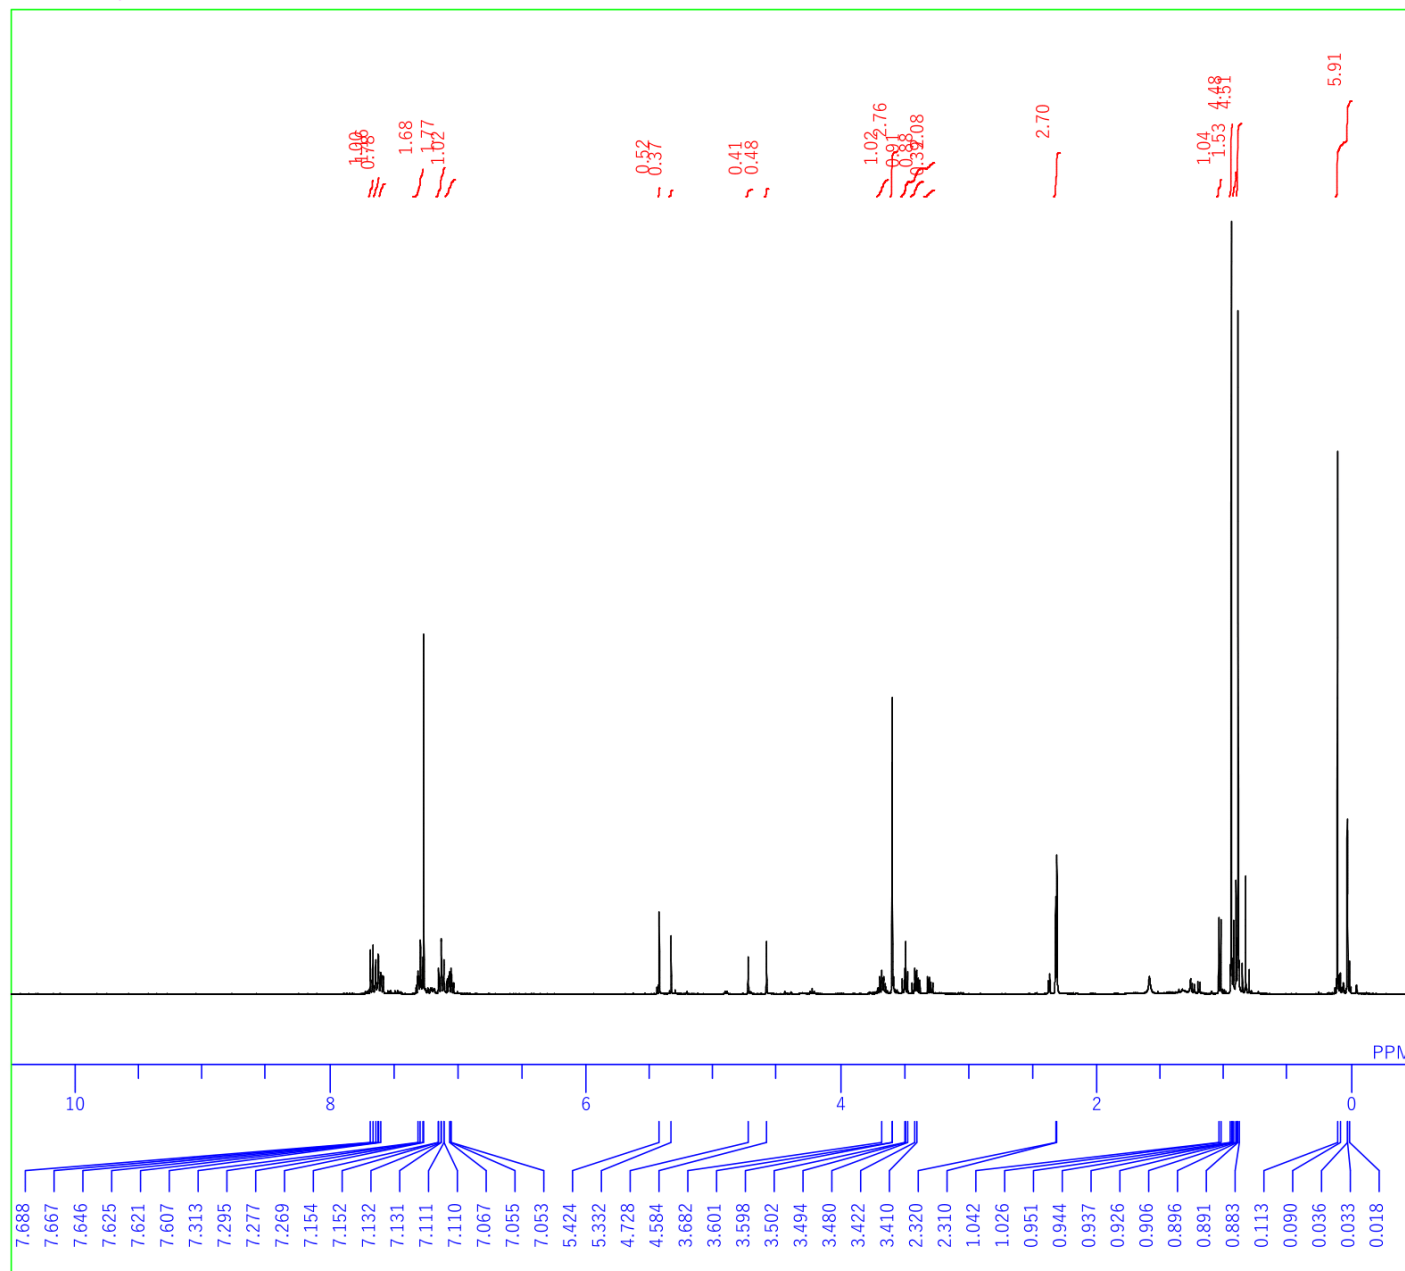

DFILE M7-46-sankaime-cdcl3.als  
 COMNT  
 DATIM 2023-08-23 11:34:15  
 OBNUC H1  
 EXMOD s2pul  
 OBFRQ 399.91 MHz  
 OBSET 1.99 KHz  
 OBFIN 2.00 Hz  
 POINT 32768  
 FREQU 6410.26 Hz  
 SCANS 32  
 ACQTM 3.5000 sec  
 PD 1.0000 sec  
 PW1 7.15 usec  
 IRNUC  
 CTEMP 37.0 c  
 SLVNT cdcl3  
 EXREF 0.00 ppm  
 BF 0.10 Hz  
 RGAIN 36

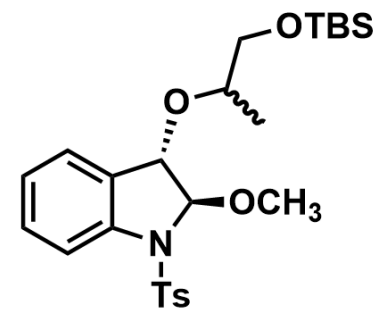

**TBS-5**

D:\Y13C NMR \BY13C-M7-46-sankaime-cdcl3.fid\Y13C-M7-46-sankaime-cdcl3.als

**Figure S2.  $^{13}\text{C}$ -NMR of TBS-5**

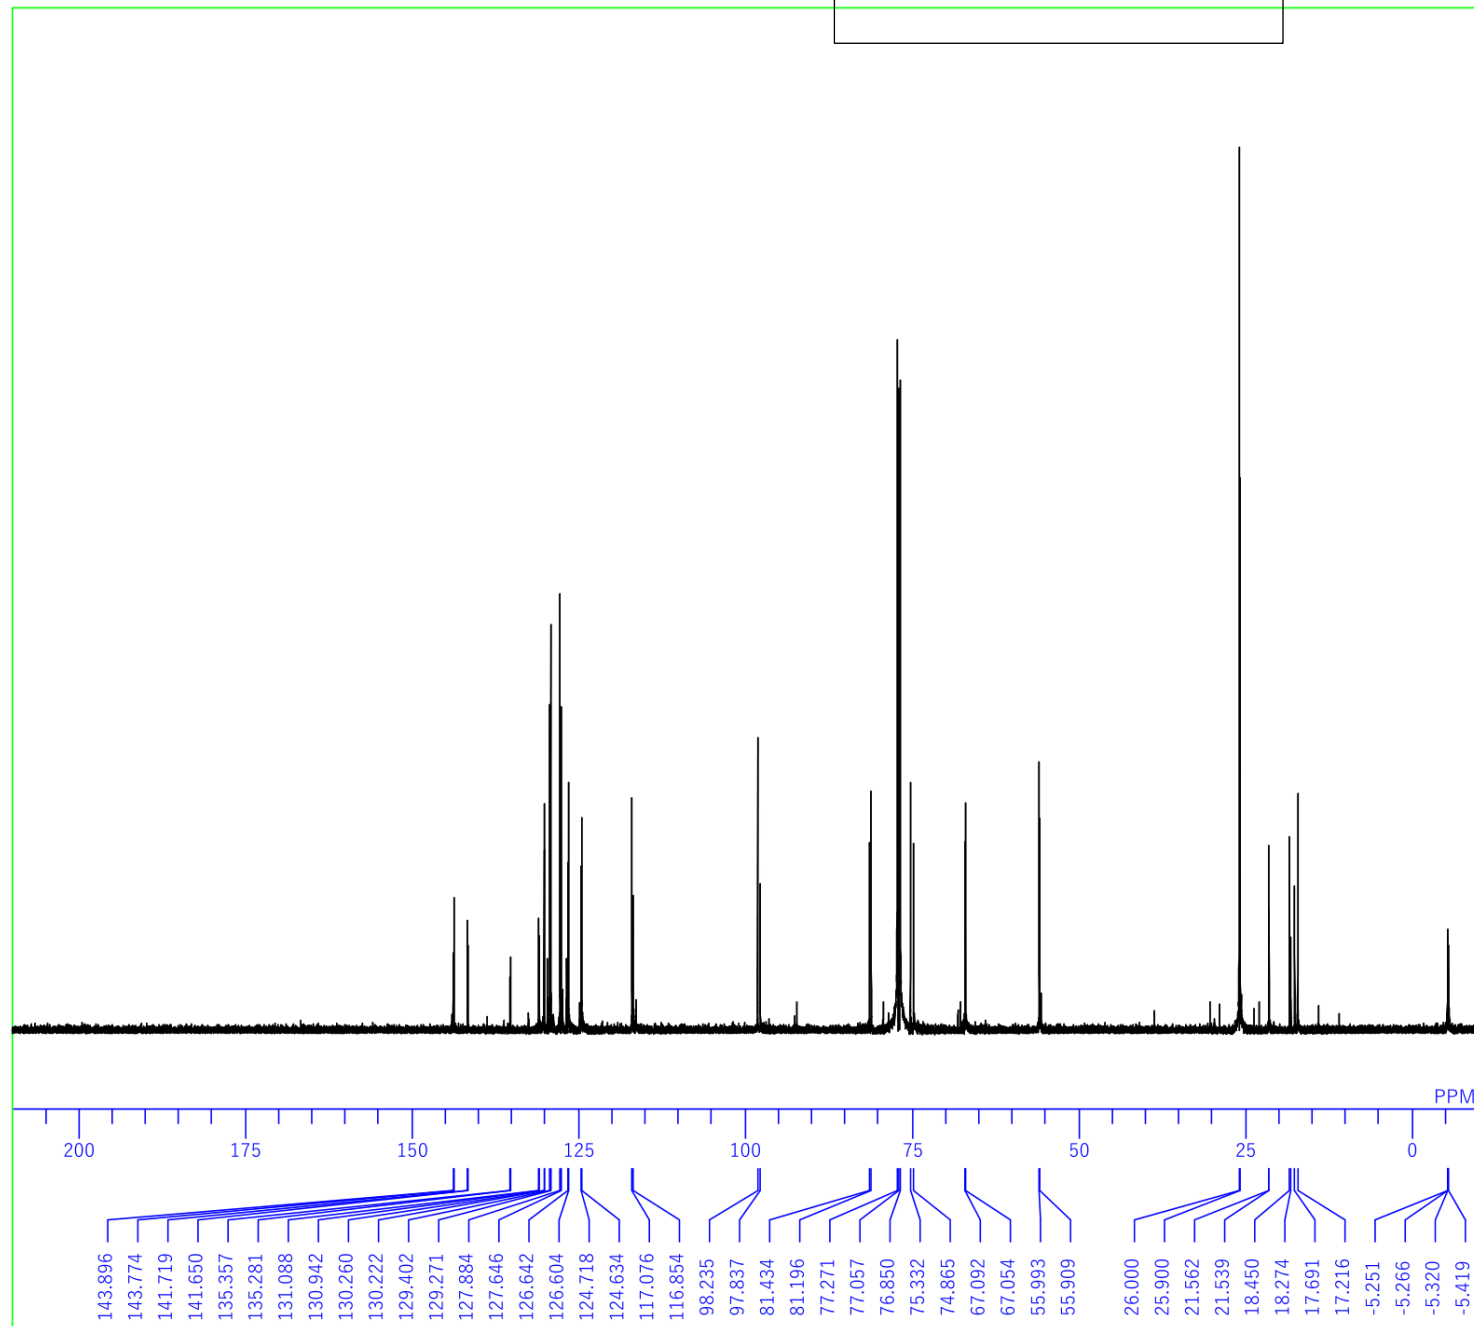

DFILE 13C-M7-46-sankaime-cdcl3.als  
 COMNT  
 DATIM 2023-08-23 12:47:06  
 OBNUC C13  
 EXMOD s2pul  
 OBFRQ 150.82 MHz  
 OBSET 6.72 KHz  
 OBFIN 8.70 Hz  
 POINT 32768  
 FREQU 37878.79 Hz  
 SCANS 64  
 ACQTM 0.8651 sec  
 PD 1.0000 sec  
 PW1 6.10 usec  
 IRNUC  
 CTEMP 15.0 c  
 SLVNT cdcl3  
 EXREF 0.00 ppm  
 BF 0.10 Hz  
 RGAIN 60

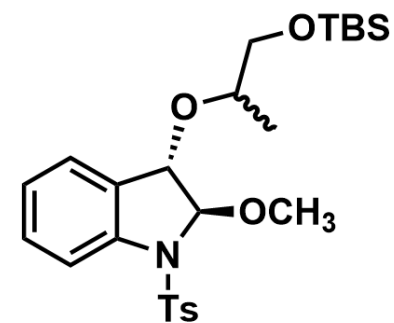

**TBS-5**

**Figure S3. <sup>1</sup>H-NMR of 5**

D:\Y-1-1-pf\ff\fgY%» 7 5YM7-52-1-cdcl3.fidYM7-52-1-cdcl3.als

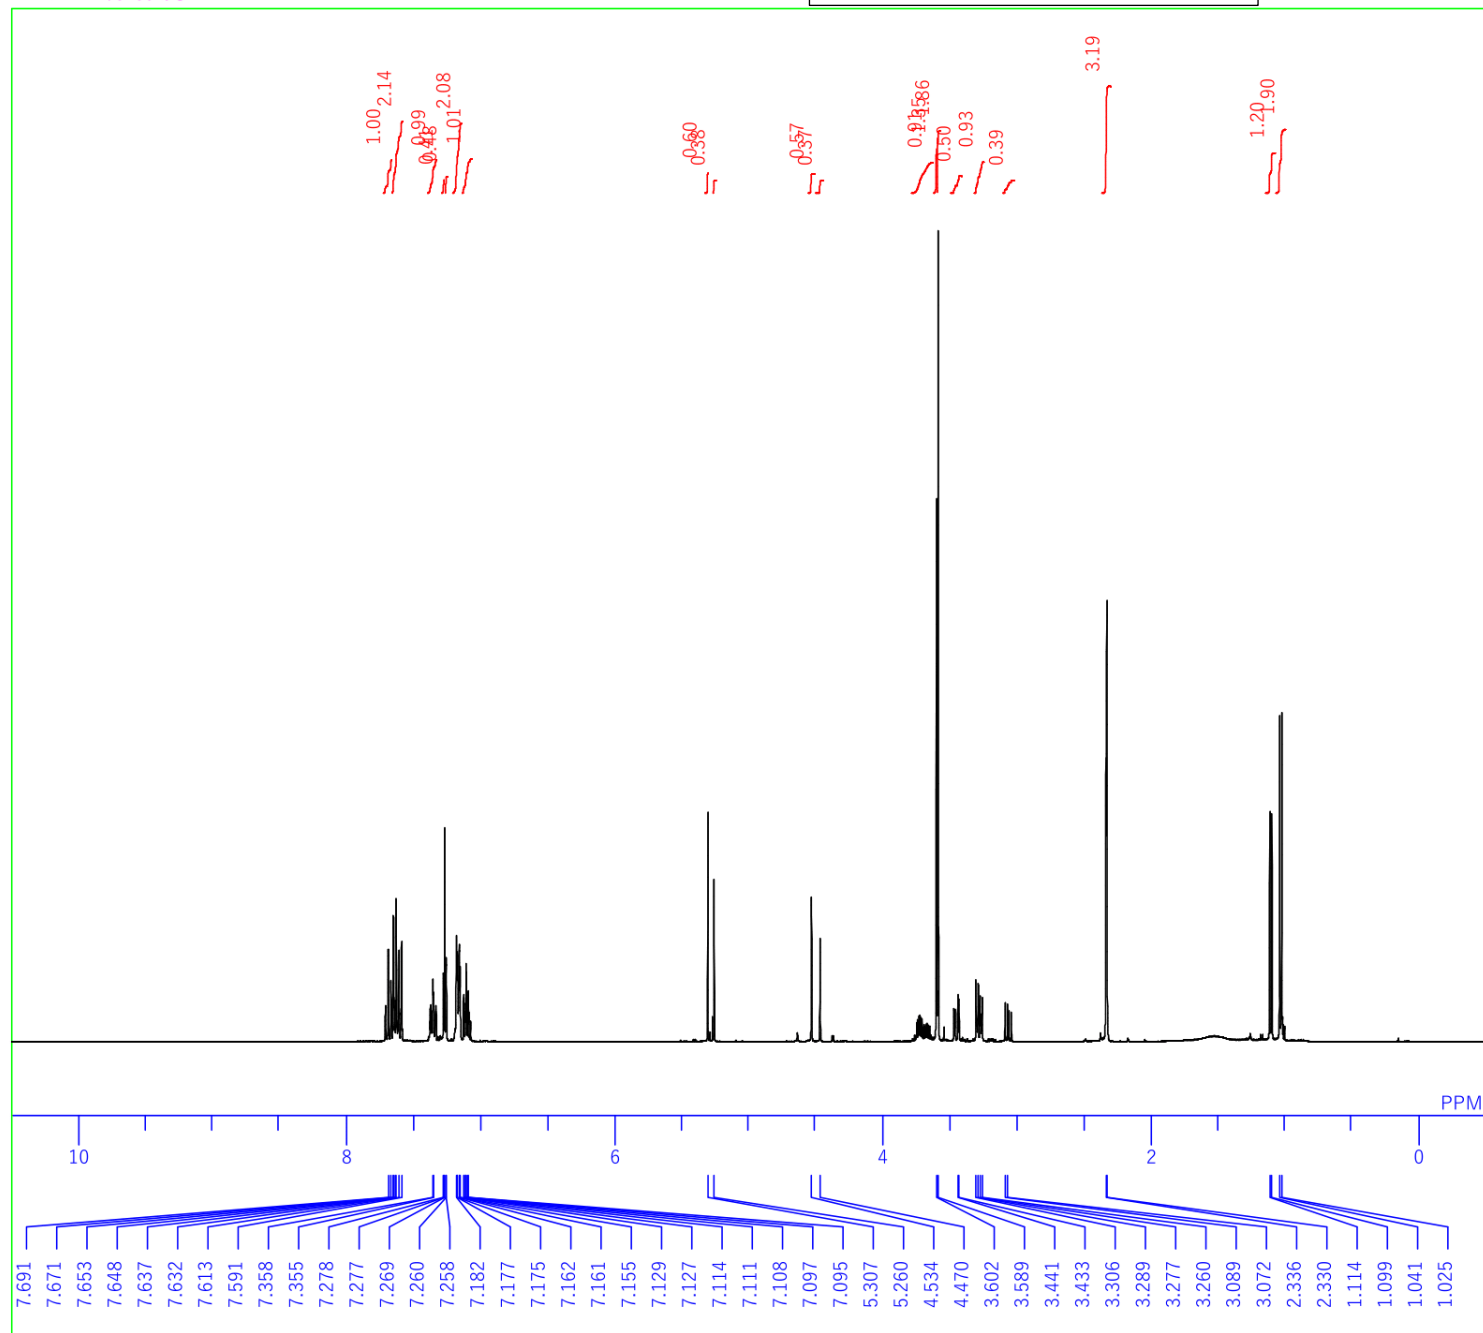

DFILE M7-52-1-cdcl3.als  
 COMNT  
 DATIM 2023-08-25 15:23:20  
 OBNUC H1  
 EXMOD s2pul  
 OBFRQ 399.91 MHz  
 OBSET 1.99 KHz  
 OBFIN 2.00 Hz  
 POINT 32768  
 FREQU 6410.26 Hz  
 SCANS 32  
 ACQTM 3.5000 sec  
 PD 1.0000 sec  
 PW1 7.15 usec  
 IRNUC  
 CTEMP 37.0 c  
 SLVNT cdcl3  
 EXREF 0.00 ppm  
 BF 0.10 Hz  
 RGAIN 36

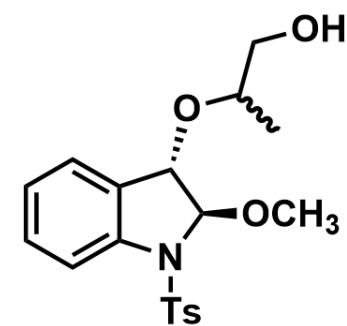

**5**

Figure S4.  $^{13}\text{C}$ -NMR of 5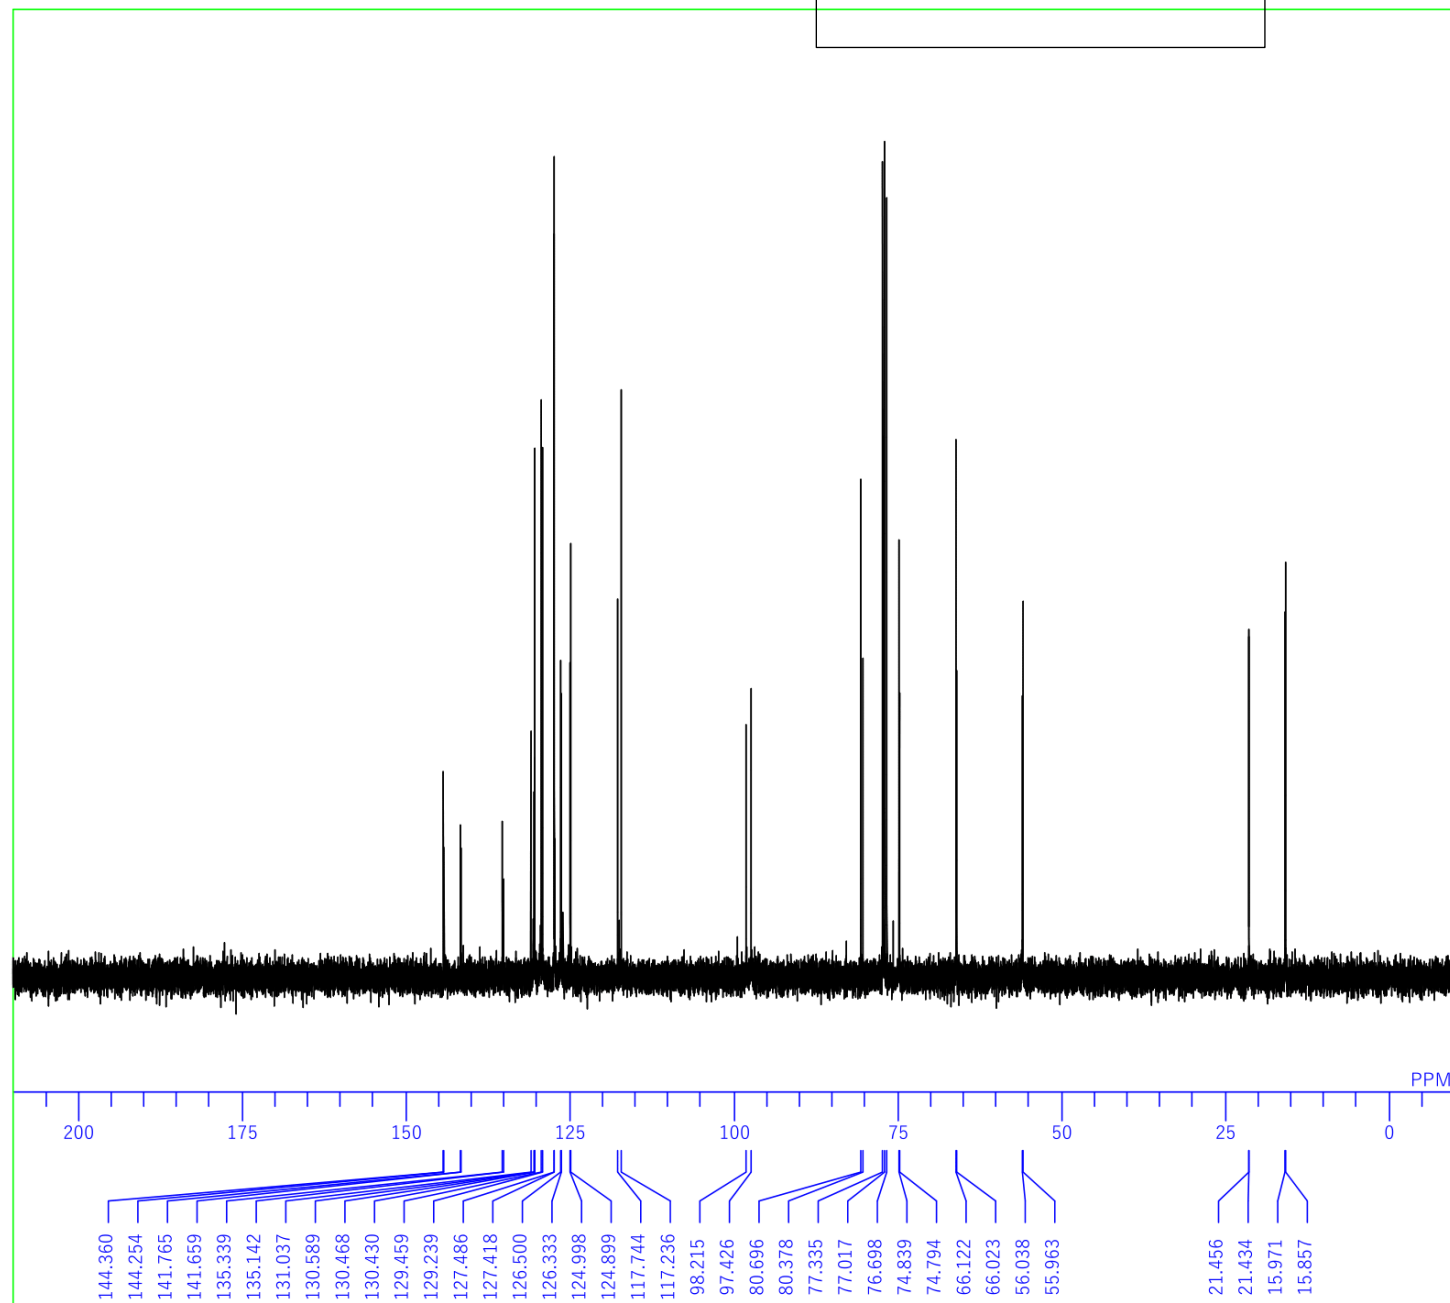

DFILE 13C-M7-52-1-cdcl3.als  
COMNT  
DATIM 2023-08-25 15:36:13  
OBNUC C13  
EXMOD s2pul  
OBFRQ 100.56 MHz  
OBSET 8.40 KHz  
OBFIN 8.30 Hz  
POINT 32768  
FREQU 25000.00 Hz  
SCANS 64  
ACQTM 1.3107 sec  
PD 1.0000 sec  
PW1 5.95 usec  
IRNUC  
CTEMP 37.0 c  
SLVNT cdcl3  
EXREF 0.00 ppm  
BF 0.10 Hz  
RGAIN 54

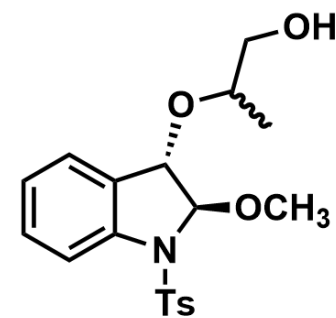**5**

Figure S5. <sup>1</sup>H-NMR of 6

D:\Psi\\_\*\—pf\ff[fgY%»‡\_\*" 6\M7-16-1-cdcl3.fid\M7-16-1-cdcl3.als

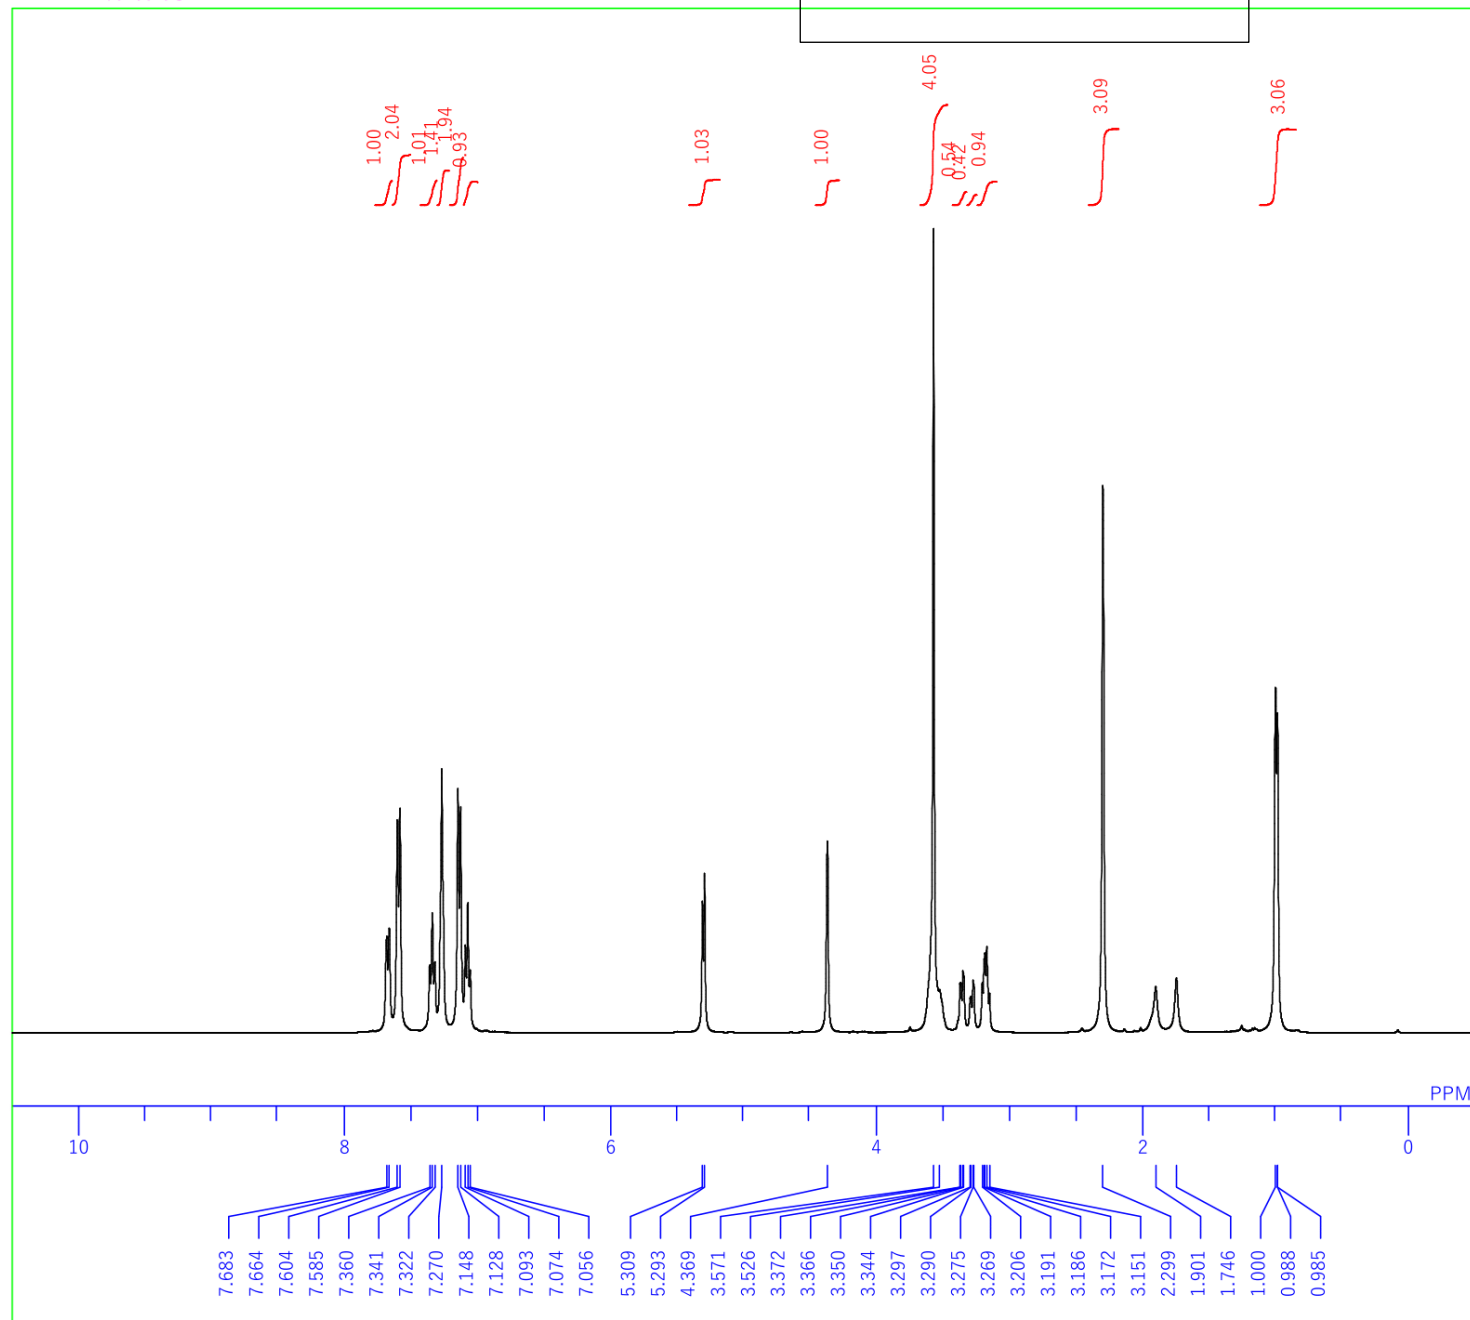

DFILE M7-16-1-cdcl3.als  
 COMNT STANDARD PHOSPHORUS PARAMETERS  
 DATIM 2023-08-07 21:52:01  
 OBNUC H1  
 EXMOD s2pul  
 OBFRQ 399.91 MHz  
 OBSET 1.99 KHz  
 OBFIN 2.00 Hz  
 POINT 32768  
 FREQU 6410.26 Hz  
 SCANS 32  
 ACQTM 3.5000 sec  
 PD 1.0000 sec  
 PW1 7.15 usec  
 IRNUC  
 CTEMP 37.0 c  
 SLVNT cdcl3  
 EXREF 0.00 ppm  
 BF 0.10 Hz  
 RGAIN 24

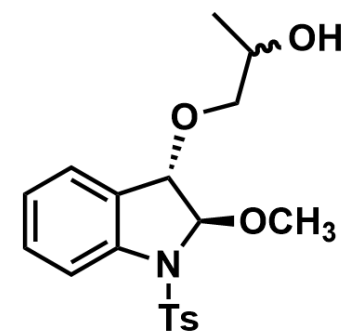

6

D:\Y13C NMR\BY13C-M7-16-1-cdcl3.fid\Y13C-M7-16-1-cdcl3.als

Figure S6.  $^{13}\text{C}$ -NMR of 6

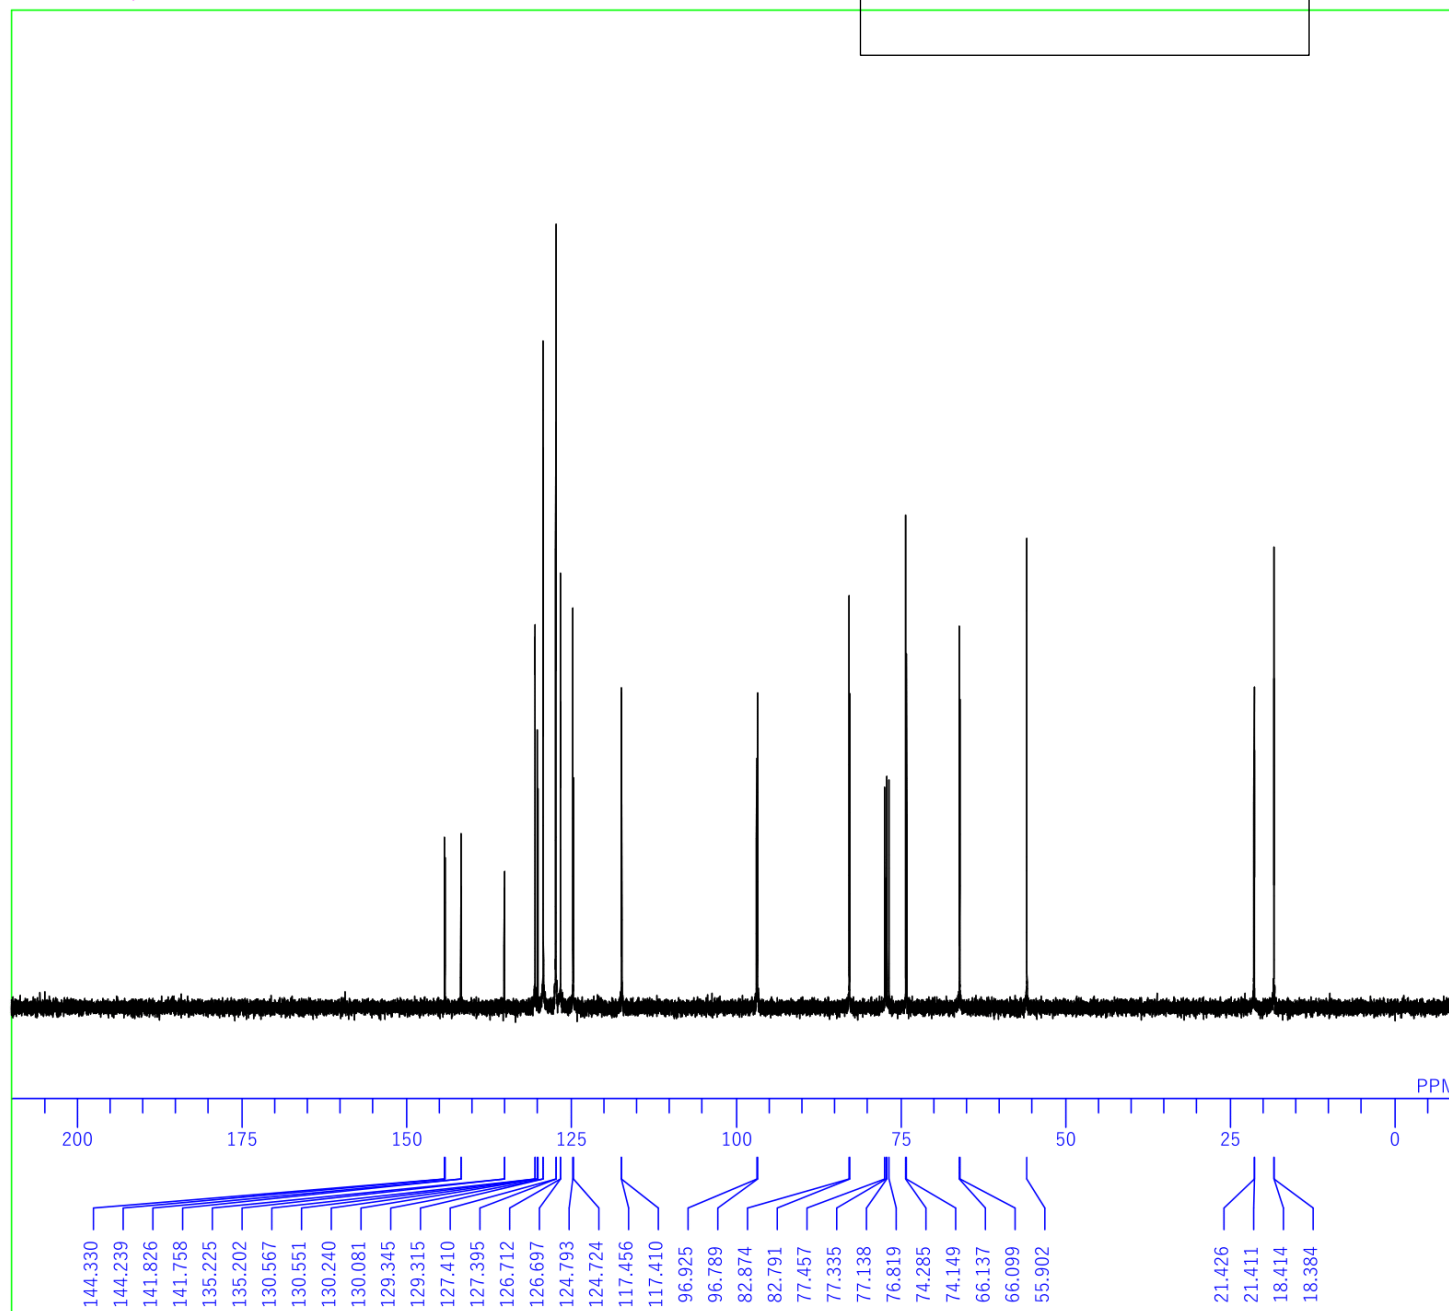

DFILE 13C-M7-16-1-cdcl3.als  
 COMNT STANDARD PHOSPHORUS PARAMETERS  
 DATIM 2023-08-07 22:05:53  
 OBNUC C13  
 EXMOD s2pul  
 OBFREQ 100.56 MHz  
 OBSET 8.40 KHz  
 OBFIN 8.30 Hz  
 POINT 32768  
 FREQU 25000.00 Hz  
 SCANS 64  
 ACQTM 1.3107 sec  
 PD 1.0000 sec  
 PW1 5.95 usec  
 IRNUC  
 CTEMP 37.0 c  
 SLVNT cdcl3  
 EXREF 0.00 ppm  
 BF 0.10 Hz  
 RGAIN 54

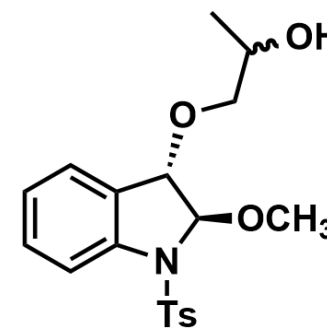

**Figure S7. <sup>1</sup>H-NMR of TBS-7**

D:\Y\... TBS-9 " 9YM5-79-2-nikaime-cdcl3.fidYM5-79-2-nikaime-cdcl3.als

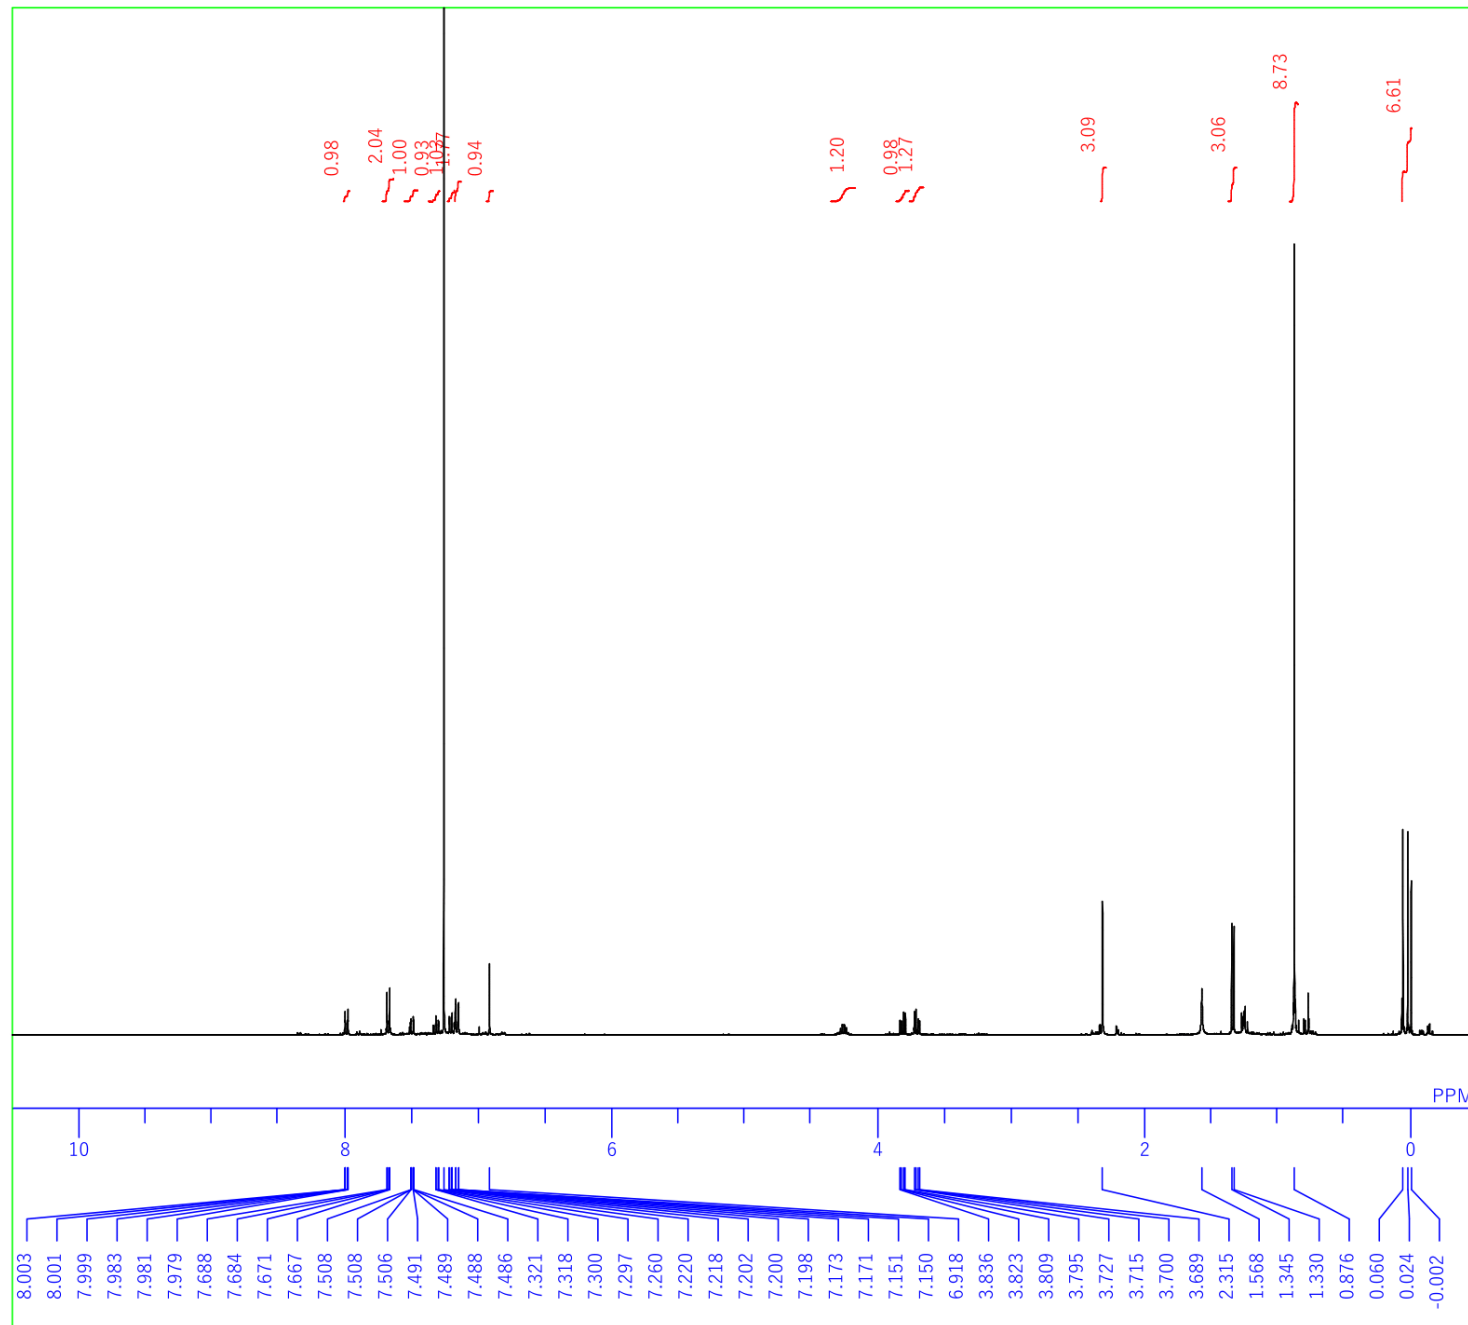

DFILE M5-79-2-nikaime-cdcl3.als  
 COMNT TK-II-70-b  
 DATIM 2023-02-24 11:03:51  
 OBNUC H1  
 EXMOD s2pul  
 OBFRQ 399.91 MHz  
 OBSET 1.99 KHz  
 OBFIN 2.00 Hz  
 POINT 32768  
 FREQU 6410.26 Hz  
 SCANS 32  
 ACQTM 3.5000 sec  
 PD 1.0000 sec  
 PW1 7.15 usec  
 IRNUC  
 CTEMP 37.0 c  
 SLVNT cdcl3  
 EXREF 7.26 ppm  
 BF 0.10 Hz  
 RGAIN 48

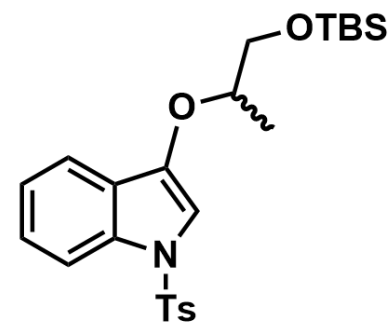

**TBS-7**



**Figure S8.  $^{13}\text{C}$ -NMR of TBS-7**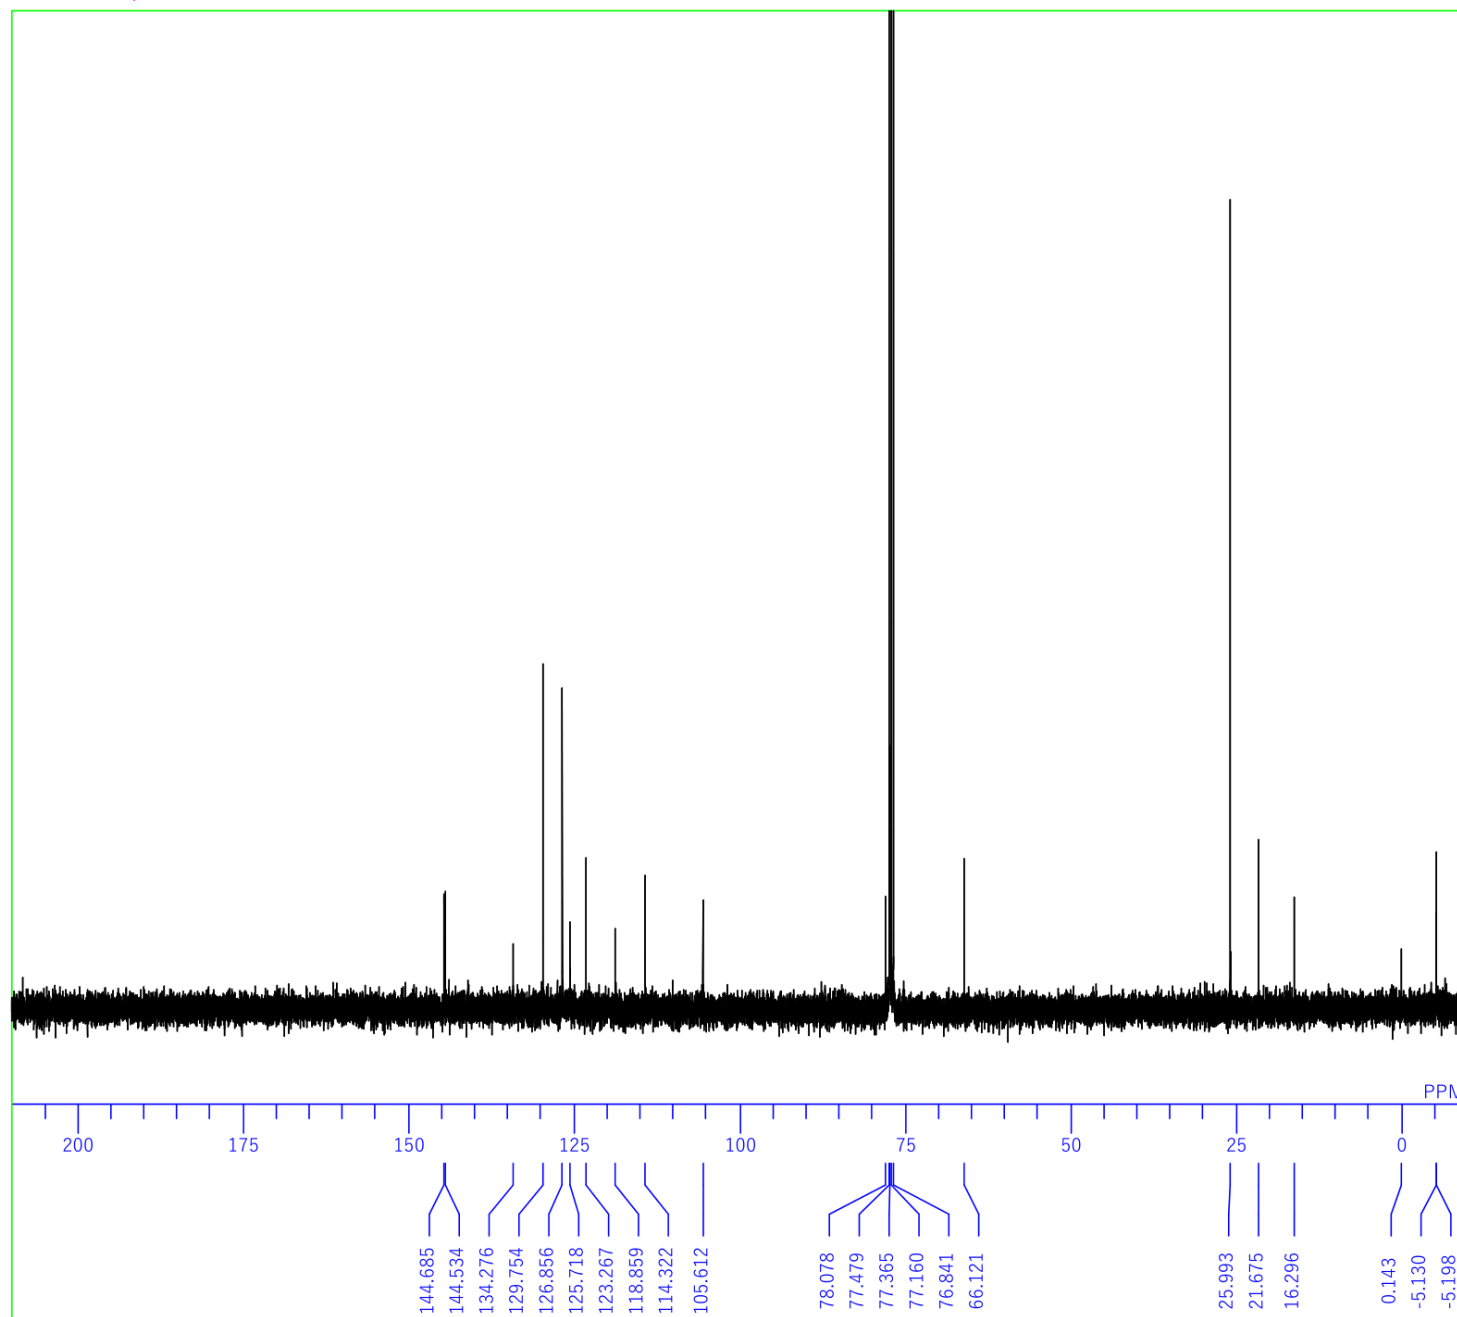

DFILE 13C-M5-79-2-nikaime-cdcl3.als  
COMNT TK-II-70-b  
DATIM 2023-02-24 11:11:00  
OBNUC C13  
EXMOD s2pul  
OBFRQ 100.56 MHz  
OBSET 8.40 KHz  
OBFIN 8.30 Hz  
POINT 32768  
FREQU 25000.00 Hz  
SCANS 64  
ACQTM 1.3107 sec  
PD 1.0000 sec  
PW1 5.95 usec  
IRNUC  
CTEMP 37.0 c  
SLVNT cdcl3  
EXREF 77.16 ppm  
BF 0.10 Hz  
RGAIN 42

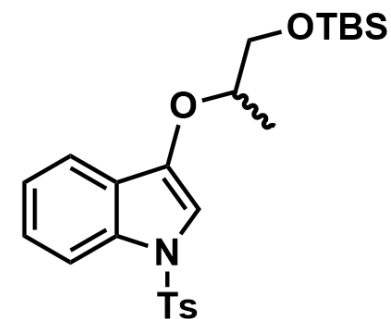**TBS-7**

D:\Y1H NMR\@YM5-81-1-cdcl3.fid\YM5-81-1-cdcl3.als

Figure S9. <sup>1</sup>H-NMR of 7

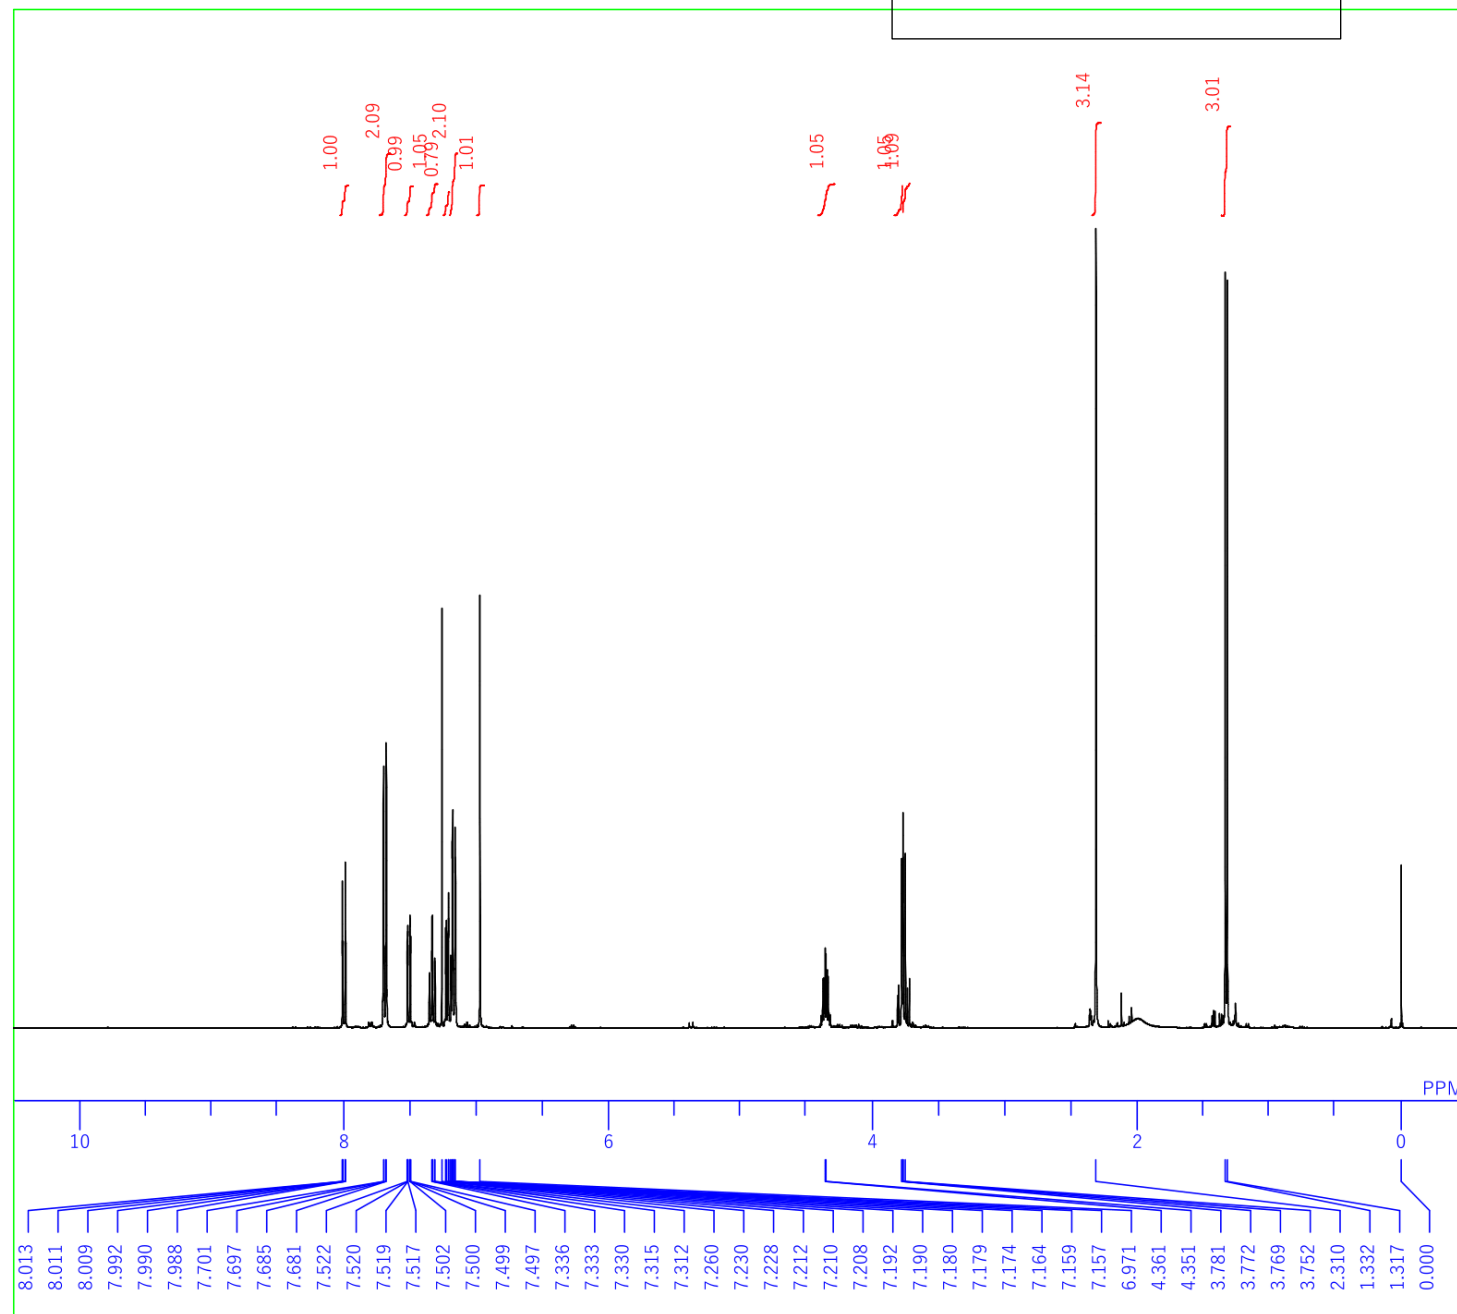

DFILE M5-81-1-cdcl3.als  
 COMNT TK-II-70-b  
 DATIM 2023-02-24 10:08:56  
 OBNUC H1  
 EXMOD s2pul  
 OBFRQ 399.91 MHz  
 OBSET 1.99 KHz  
 OBFIN 2.00 Hz  
 POINT 32768  
 FREQU 6410.26 Hz  
 SCANS 32  
 ACQTM 3.5000 sec  
 PD 1.0000 sec  
 PW1 7.15 usec  
 IRNUC  
 CTEMP 37.0 c  
 SLVNT cdcl3  
 EXREF 7.26 ppm  
 BF 0.10 Hz  
 RGAIN 38

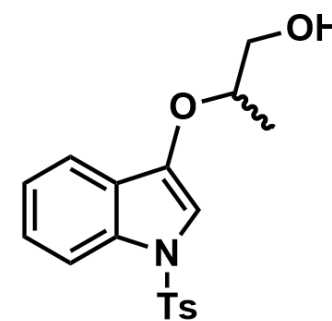

7

**Figure S10.  $^{13}\text{C}$ -NMR of 7**

D:\Y13C NMR \@¥13C-M5-81-1-cdcl3.fid¥13C-M5-81-1-cdcl3.als

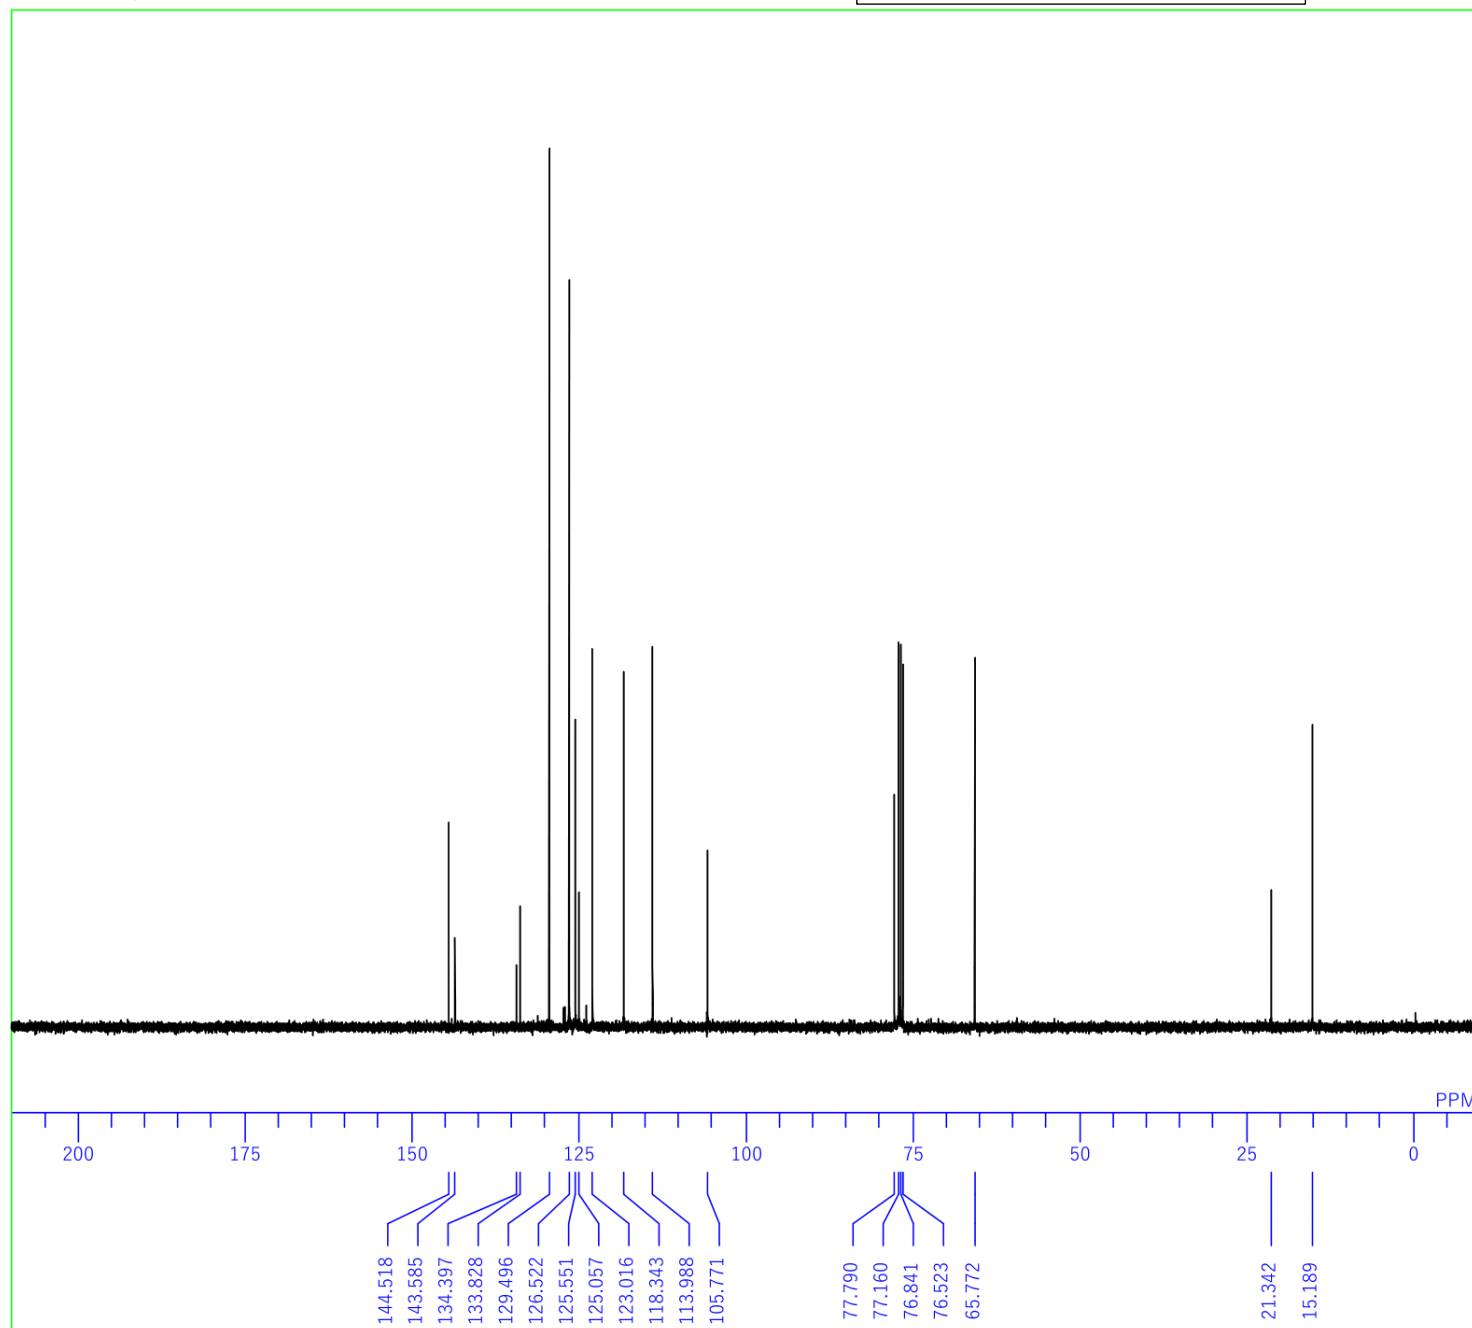

DFILE 13C-M5-81-1-cdcl3.als  
 COMNT TK-II-70-b  
 DATIM 2023-02-24 10:14:36  
 OBNUC C13  
 EXMOD s2pul  
 OBFRQ 100.56 MHz  
 OBSET 8.40 KHz  
 OBFIN 8.30 Hz  
 POINT 32768  
 FREQU 25000.00 Hz  
 SCANS 64  
 ACQTM 1.3107 sec  
 PD 1.0000 sec  
 PW1 5.95 usec  
 IRNUC  
 CTEMP 37.0 c  
 SLVNT cdcl3  
 EXREF 77.16 ppm  
 BF 0.10 Hz  
 RGAIN 48

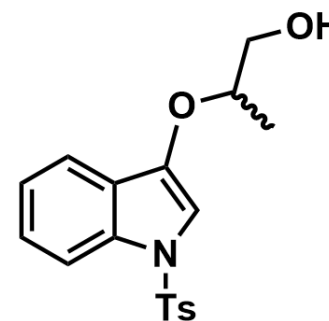

**7**

**Figure S11. <sup>1</sup>H-NMR of 3**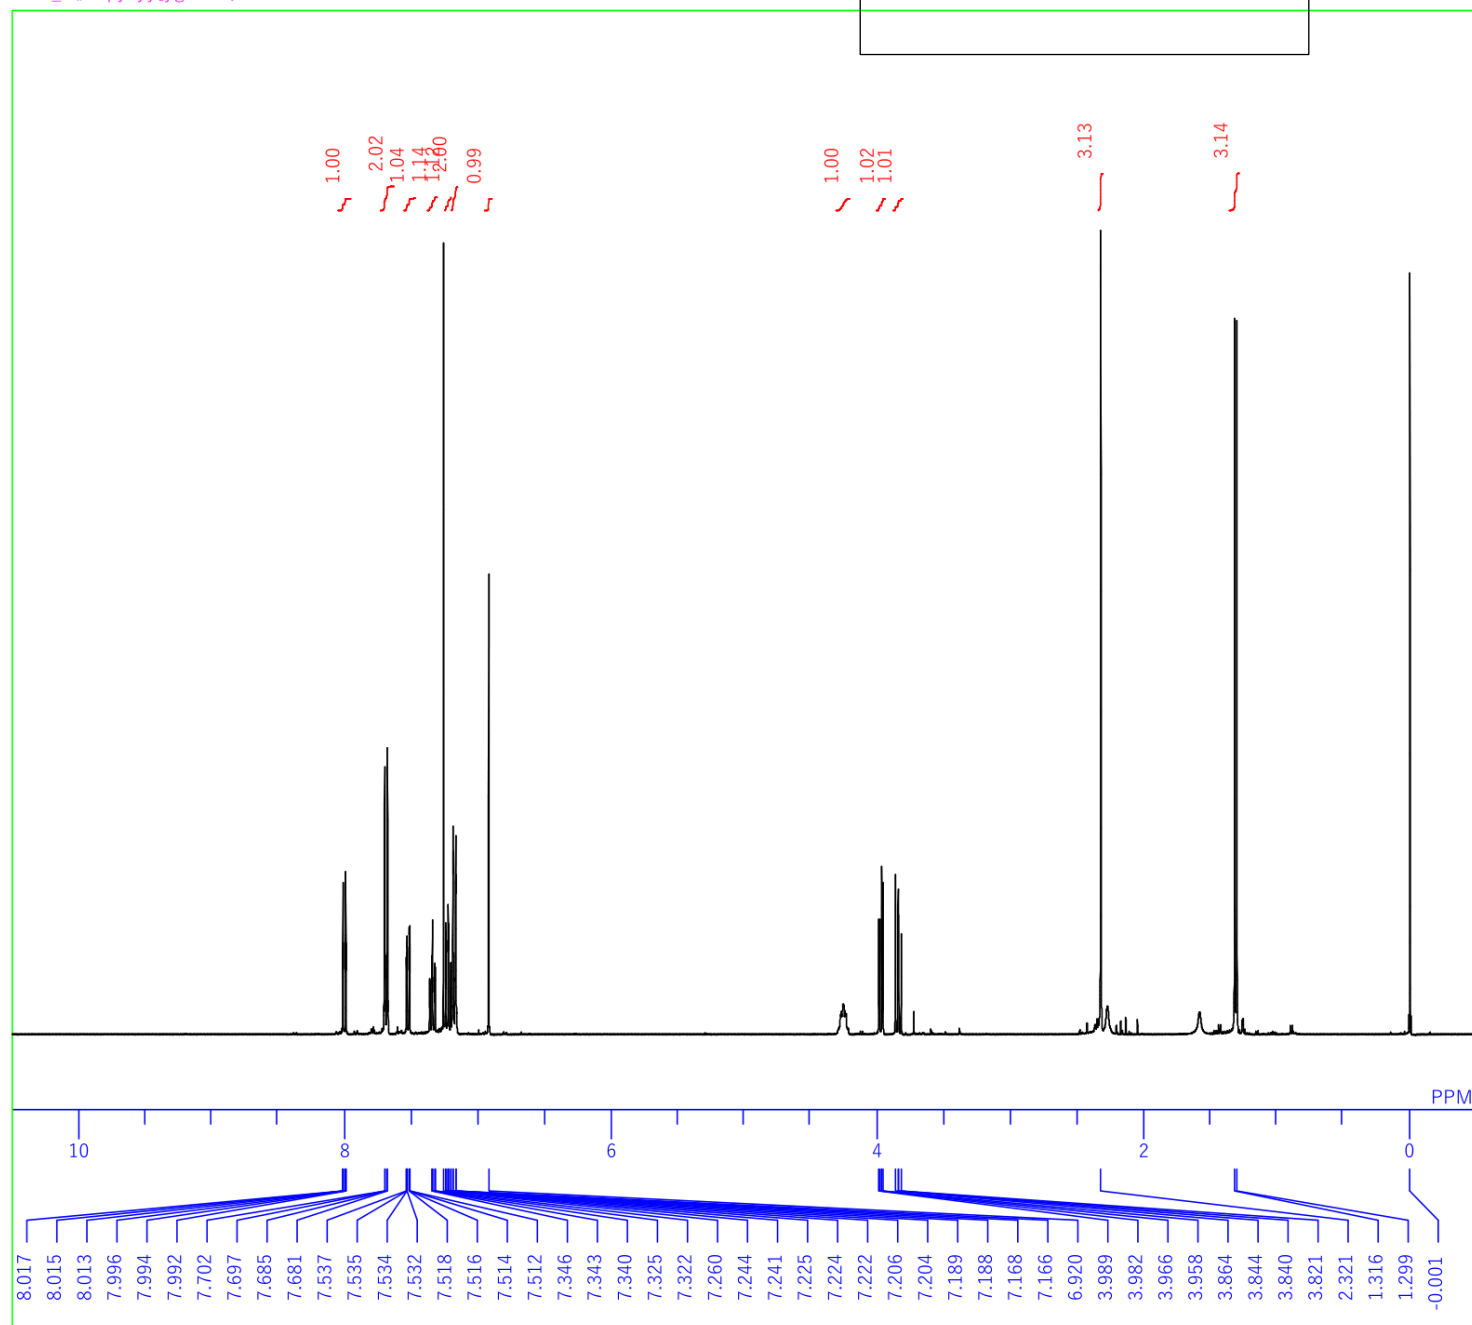

DFILE M5-71-2-sankaime-cdcl3.als  
COMNT  
DATIM 2023-02-22 12:19:40  
OBNUC H1  
EXMOD s2pul  
OBFRQ 399.91 MHz  
OBSET 1.99 KHz  
OBFIN 2.00 Hz  
POINT 32768  
FREQU 6410.26 Hz  
SCANS 32  
ACQTM 3.5000 sec  
PD 1.0000 sec  
PW1 7.15 usec  
IRNUC  
CTEMP 37.0 c  
SLVNT cdcl3  
EXREF 7.26 ppm  
BF 0.10 Hz  
RGAIN 42

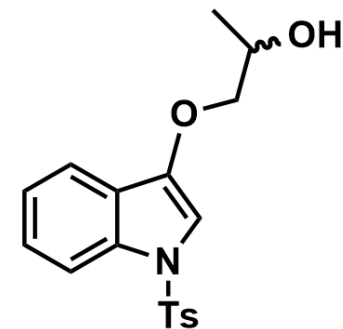**3**

Figure S12.  $^{13}\text{C}$ -NMR of 3

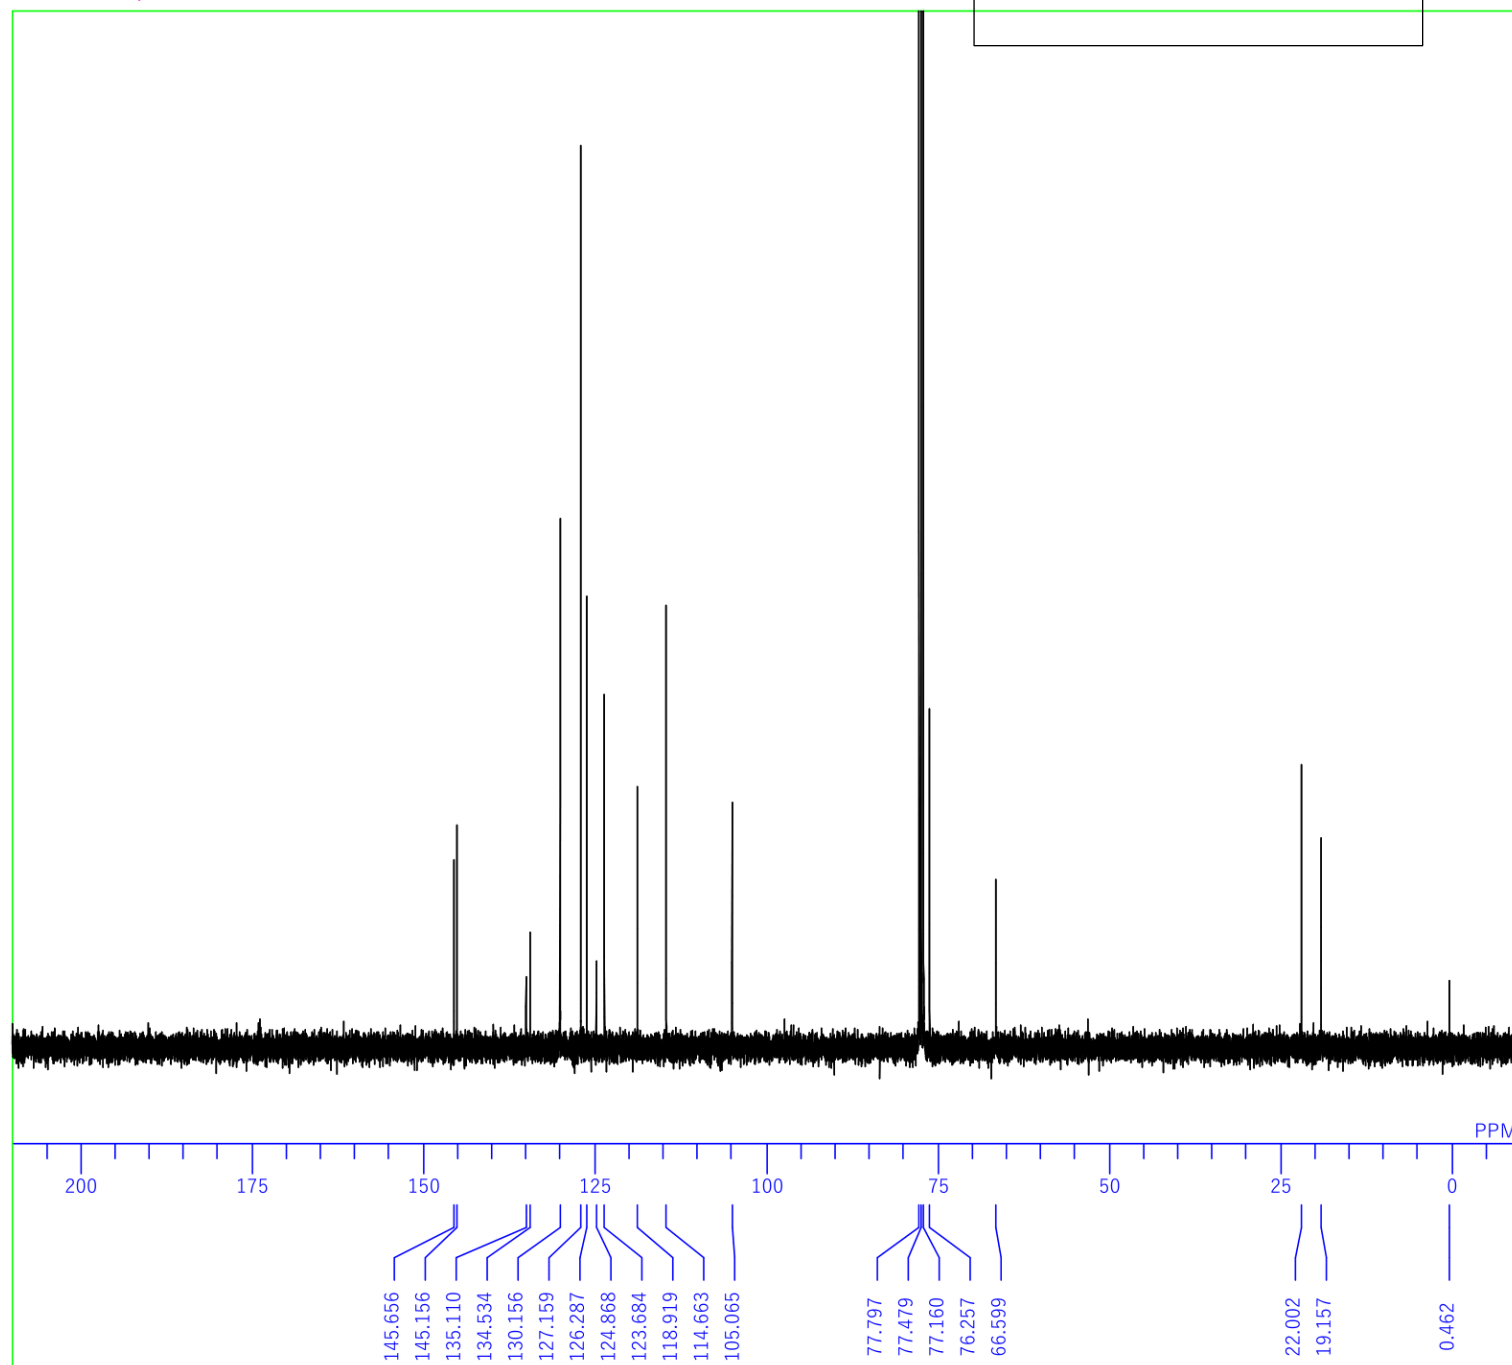

DFILE 13C-M5-71-2-sankaime-cdcl3.als  
 COMNT  
 DATIM 2023-02-22 12:25:38  
 OBNUC C13  
 EXMOD s2pul  
 OBFRQ 100.56 MHz  
 OBSET 8.40 KHz  
 OBFIN 8.30 Hz  
 POINT 32768  
 FREQU 25000.00 Hz  
 SCANS 64  
 ACQTM 1.3107 sec  
 PD 1.0000 sec  
 PW1 5.95 usec  
 IRNUC  
 CTEMP 37.0 c  
 SLVNT cdcl3  
 EXREF 77.16 ppm  
 BF 0.10 Hz  
 RGAIN 54

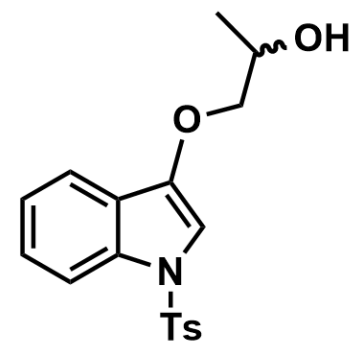

3

D:\Y\1-pf\ff\fg\Y%»±•" 1\M7-36-1-nikaime-meod.fid\M7-36-1-nikaime-meod.als

Figure S13. <sup>1</sup>H-NMR of 1

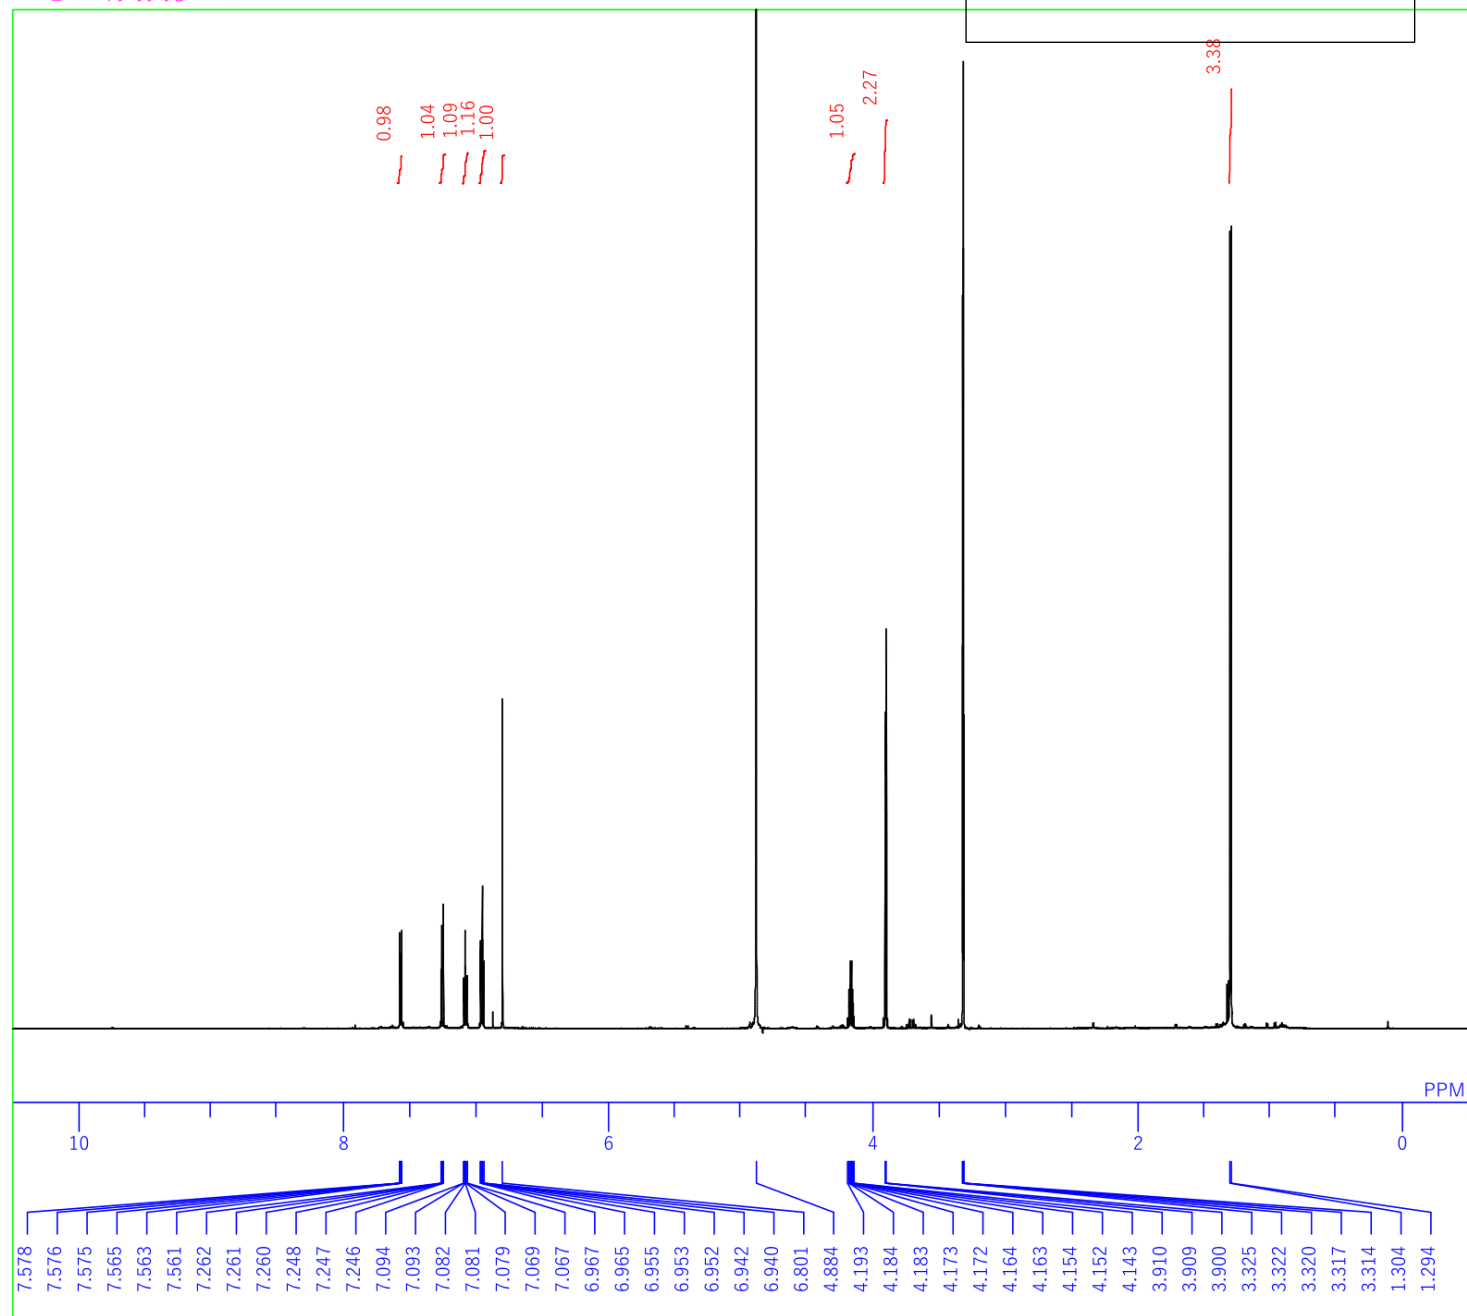

DFILE M7-36-1-nikaime-meod.als  
 COMNT  
 DATIM 2023-08-10 18:00:19  
 OBNUC H1  
 EXMOD s2pul  
 OBFRQ 599.76 MHz  
 OBSET 7.42 KHz  
 OBFIN 3.60 Hz  
 POINT 32768  
 FREQU 9615.38 Hz  
 SCANS 32  
 ACQTM 3.4079 sec  
 PD 1.0000 sec  
 PW1 5.65 usec  
 IRNUC  
 CTEMP 15.0 c  
 SLVNT cd3od  
 EXREF 0.00 ppm  
 BF 0.10 Hz  
 RGAIN 46

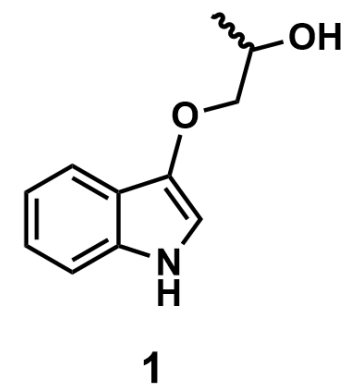

D:\\_•¶—pf`ff[fg¥%»‡•`1¥13C-M7-38-2-meod-2.fid¥13C-M7-38-2-meod-2-power.als

Figure S14. <sup>13</sup>C-NMR of 1

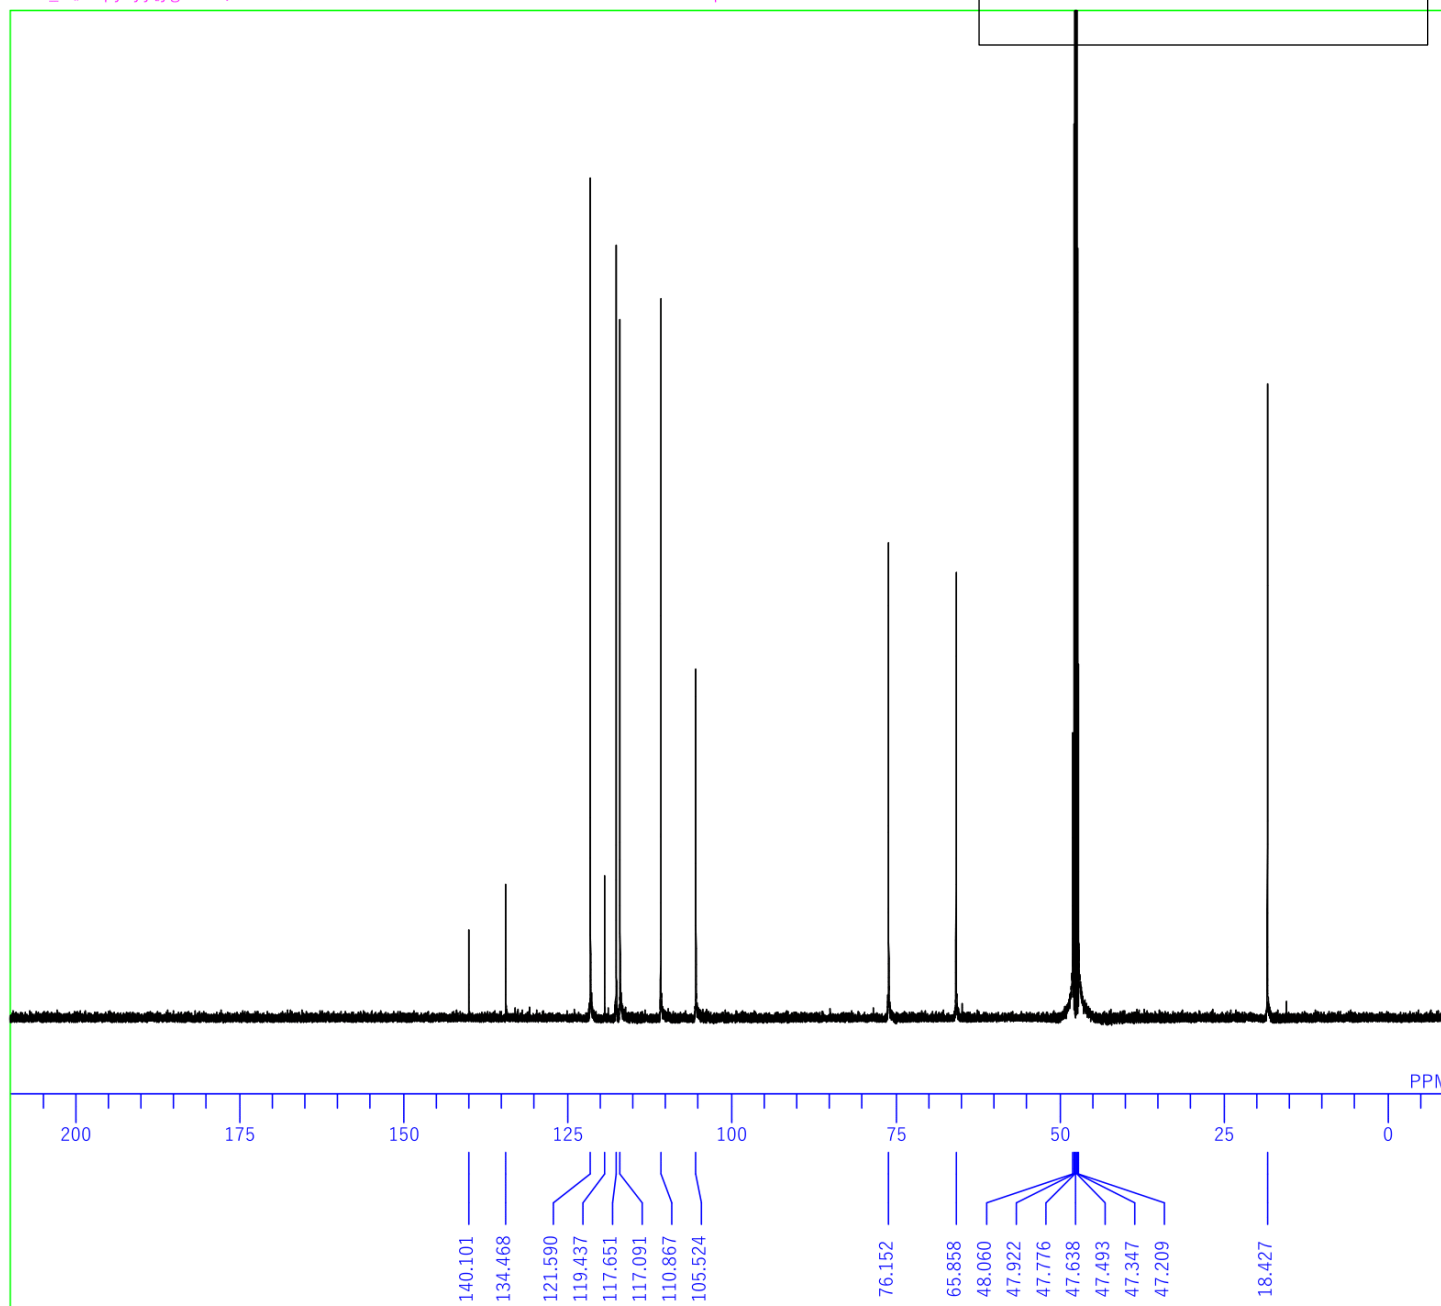

DFILE 13C-M7-38-2-meod-2-power.als  
 COMNT  
 DATIM 2023-08-11 15:21:29  
 OBNUC C13  
 EXMOD s2pul  
 OBFRQ 150.82 MHz  
 OBSET 7.32 KHz  
 OBFIN 2.90 Hz  
 POINT 32768  
 FREQU 37878.79 Hz  
 SCANS 64  
 ACQTM 0.8651 sec  
 PD 1.0000 sec  
 PW1 6.10 usec  
 IRNUC  
 CTEMP 15.0 c  
 SLVNT cd3od  
 EXREF 0.00 ppm  
 BF 0.10 Hz  
 RGAIN 60

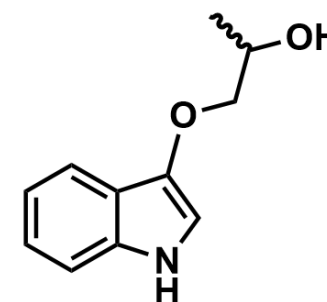

1
